# Supplementary material
Source: publisher figshare collection journal article supplement (https://gsapubs.figshare.com/ndownloader/files/22758632)
Supplement: Supplementary file 1 [file 22758632]

## **Data Repository Item 2009066**

### **Climatic control on Quaternary coal fires and landscape evolution, Powder River basin, Wyoming and Montana**

Catherine A. Riihimaki, Peter W. Reiners, and Edward L. Heffern

#### **Supporting Materials**

##### **Data**

The sample numbers, locations, and zircon He ages are presented in Table S1. Most ages are weighted means of ages of multiple replicate analyses (typically 2-5) and uncertainties are standard errors. Some samples, however, comprise single analyses.

##### **Lab Methodology**

Dated grains were selected from mineral separates with Leica MZ16 stereozoom microscopes under both brightfield and darkfield, at 160-240x magnification. Grains were measured using digital cameras and image analysis software, to calculate alpha-ejection corrections and estimate parent and daughter nuclide concentrations. Alpha-ejection corrections for zircon were made following methods in the paper by Hourigan et al. (Hourigan et al., 2005). Grains were wrapped in Nb foil “microfurnaces” for laser heating (House et al., 2000). Crystal-bearing foil packets were heated by Nd:YAG laser to extract He gas, which was then spiked with  $^3\text{He}$ . Helium contents were measured with an electron multiplier in a quadrupole mass spectrometer, and calculated from interference-, background-, and procedural-blank-corrected  $4/3$  ratios by reference to an on-line, manometrically calibrated  $^4\text{He}$  standard. Linearity of the referencing has been confirmed over a  $10^3$ -fold intensity range. Corrected  $4/3$  measurements on reference standards vary by less than 0.5% ( $1\sigma$ ). Procedural blanks measured by lasing/heating empty foil packets are typically 0.05-0.1 fmol  $^4\text{He}$ .

Following He measurement, foil packets were retrieved, transferred to Teflon vials, and spiked with  $^{233}\text{U}$  and  $^{229}\text{Th}$ . All samples were dissolved directly from foils in HF-HNO<sub>3</sub>-HCl in high-pressure digestion vessels. Natural-to-spike isotope ratios were measured on a high-resolution (single-collector) Element2 ICP-MS. Precision on measured ratios for single grain apatites were generally 0.1-0.5% RSD, and analytical uncertainty on the isotope dilution measurements were typically <1.5% (1 $\sigma$ ). Routine U-Th procedural blanks for zircon are  $2.6 \pm 0.5$  pg U and  $5.5 \pm 1.0$  pg Th (for more information see Reiners and Nicolescu (2006): <http://www.geo.arizona.edu/~reiners/arhdl/arhdlrep1.pdf>).

Propagated analytical uncertainties for most zircon samples lead to an analytical uncertainty on (U-Th)/He ages of approximately 1-3% (1 $\sigma$ ). In some cases, actual observed reproducibility of multiple aliquots approaches analytical uncertainty (e.g., 2.6% (2 $\sigma$ ) for 150 ka zircons (Blondes et al., 2007), and 2.3% (2 $\sigma$ ) for gem-quality zircons (Nasdala et al., 2004)). In general, however, reproducibility of repeat analyses of (U-Th)/He ages is significantly worse than analytical precision. Cooling ages of zircon from igneous rocks typically show scatter on the order of one standard deviation of at least 6%, and in many cases more than 10%. This has several possible origins, including variable He diffusion characteristics among grains, unidentified intracrystalline inclusions that prevent complete U-Th-Sm recovery following degassing, or petrographic siting effects such as He implantation from adjacent high-U-Th phases or varying He retention due to varying diffusivity or partitioning of surrounding phases. As discussed above, however, it is likely that a major origin of the observed poor reproducibility comes through uncertainty in the alpha-ejection correction (Farley et al., 1996)—not from uncertainty in actual dimensions of dated grains, but uncertainties in relating observed grain boundaries of dated aliquots to original boundaries in the host rock, implantation from other phases, and inhomogeneous distribution of parent nuclides in dated grains (Farley et al., 1996; Hourigan et al., 2005; Reiners et al., 2004). It is extremely difficult to estimate, *a priori*, the expected magnitude of error arising from any of these potential sources. Thus He ages typically show a much greater scatter and higher MSWD than expected based on analytical precision alone, so multiple replicate analyses of (U-Th)/He ages on several aliquots is necessary for confidence in a sample's age. In this study, for

zircon He age uncertainty we adopted the larger value among the propagated analytical uncertainty, or else 8%, the latter based on observed reproducibility of other typical igneous zircons.

### **T-test Methodology**

We test the statistical relationship between a given paleoclimate time-series and clinker ages by comparing average paleoclimate conditions during clinker formation from average paleoclimate conditions for the full time-series.

We first create a synthetic data set of clinker ages to account for age uncertainties. We use a bootstrap algorithm in which, for each iteration of the algorithm, a new age for each clinker sample is chosen. We use a pseudo-random number generator that chooses each value from a normal distribution that is centered about each nominal clinker age and is scaled by the age error. Next, the paleoclimate value (e.g., eccentricity,  $\delta^{18}\text{O}$ ) for that age is determined. We therefore have two data sets: the paleoclimate values corresponding with the times clinker formed, and the paleoclimate values for the entire paleoclimate time-series.

For each iteration, we use a  $t$ -test to assess whether the mean paleoclimate values when clinker formed,  $\bar{X}_{clinker}$ , are significantly different from mean paleoclimate conditions for the entire time-series,  $\bar{X}_{all}$ . The  $t$ -value is assessed using the equation

$$t_{clinker} = \frac{\bar{X}_{clinker} - \bar{X}_{all}}{\sqrt{\sigma_{clinker}^2/n_{clinker} + \sigma_{all}^2/n_{all}}} \quad (1)$$

where  $\sigma^2$  is the variance of each data set and  $n$  is the number of samples in each data set. The larger the magnitude of  $|t_{clinker}|$ , the greater the difference between  $\bar{X}_{clinker}$  and  $\bar{X}_{all}$ , and the greater the likelihood that clinker preferentially forms during particular climatic regimes. The suite of bootstrap iterations allows assessment of the mean and standard deviation of  $t_{clinker}$ , presented in Table 1 of the manuscript.

The probability  $p$  of a Type I error in which we reject the null hypothesis  $\bar{X}_{clinker} = \bar{X}_{all}$  for each paleoclimate time-series, is determined from two-tailed  $t$ -test tables. We confirm

this result using a second synthetic data set in which  $n_{clinker}$  random ages are chosen between 0-1.1 Ma, and  $t_{random}$  is assessed. The stated  $p$ -values match the probability that  $t_{random} > t_{clinker}$  for each time-series. We also use the random ages to assess the probability of random ages producing, for all six paleoclimate records,  $t$ -value directions (i.e., positive or negative) indicating coal fires occurred during warm climatic states (i.e., times of intense summer insolation, low global ice volume, and warm Pacific Ocean temperatures). Because this is an exploratory study in which we are more interested in the relative magnitude of  $t$ -values than the absolute significance, we do not correct for multiple comparisons. However, even with a conservative Bonferroni correction, the  $t$ -value for eccentricity would be significant at  $\alpha=0.05$ .

## References Cited

- Blondes, M.B., Reiners, P.W., Edwards, B.R., and Biscontin, A.E., 2007, Dating young basalts by (U-Th)/He on xenolithic zircons: *Geology*, v. 35, p. 17-20.
- Farley, K.A., Wolf, R.A., and Silver, L.T., 1996, The effects of long alpha-stopping distances on (U-Th)/He ages: *Geochimica et Cosmochimica Acta*, v. 60, p. 4223-4229.
- Hourigan, J.K., Reiners, P.W., and Brandon, M.T., 2005, U-Th zonation-dependent alpha-ejection in (U-Th)/He chronometry: *Geochimica et Cosmochimica Acta*, v. 69, p. 3349-3365.
- House, M.A., Farley, K.A., and Stockli, D.F., 2000, Helium chronometry of apatite and titanite using Nd-YAG laser heating: *Earth and Planetary Science Letters*, v. 183, p. 365-368.
- Nasdala, L., Reiners, P.W., Garver, J.I., Kennedy, A.K., Stern, R.A., Balan, E., and Wirth, R., 2004, Incomplete retention of radiation damage in zircon from Sri Lanka: *American Mineralogist*, v. 89, p. 219-231.
- Reiners, P.W., and Nicolescu, S., 2006, Measurement of parent nuclides for (U-Th)/He chronometry by solution sector ICP-MS, ARHDL Report 1: Tucson, AZ, University of Arizona, 33 p.
- Reiners, P.W., Spell, T.L., Nicolescu, S., and Zanetti, K.A., 2004, Zircon (U-Th)/He thermochronometry: He diffusion and comparisons with  $^{40}\text{Ar}/^{39}\text{Ar}$  dating: *Geochimica et Cosmochimica Acta*, v. 68, p. 1857-1887.

**Table DR1.** Clinker sample locations and ages

| Sample   | Northing  | Easting  | Elevation (m)* | Age (Ma) | 2 $\sigma$ error (Ma) | Replicates |
|----------|-----------|----------|----------------|----------|-----------------------|------------|
| 06PRB01  | 4804917   | 471785   | 1488           | 0.016    | 0.006                 | 2          |
| 06PRB02  | 4810467   | 478859   | 1447           | 0.007    | 0.006                 | 2          |
| 06PRB03  | 4810244   | 478856   | 1434           | 0.115    | 0.008                 | 2          |
| 06PRB04  | 4809052   | 482305   | 1473           | 0.249    | 0.023                 | 1          |
| 06PRB05  | 4808952   | 482286   | 1509           | 0.096    | 0.006                 | 2          |
| 06PRB06  | 4812123   | 483588   | 1440           | 0.213    | 0.012                 | 2          |
| 06PRB07  | 4821007   | 485949   | 1494           | 0.211    | 0.012                 | 2          |
| 06PRB08  | 4822156.3 | 491148.4 | 1565           | 0.219    | 0.009                 | 2          |
| 06PRB09  | 4925125   | 468548   | 1353           | 0.105    | 0.005                 | 2          |
| 06PRB10  | 4925577.4 | 468390.8 | 1352           | 0.133    | 0.006                 | 1          |
| 06PRB11  | 4926873   | 466914   | 1359           | 0.114    | 0.005                 | 2          |
| 06PRB12  | 4925570   | 475909   | 1428           | 0.191    | 0.008                 | 2          |
| 06PRB13  | 4925635   | 475964   | 1430           | 0.188    | 0.011                 | 2          |
| 06PRB16  | 4941731   | 469533   | 1362           | 0.211    | 0.012                 | 3          |
| 06PRB19  | 5035793   | 460803   | 1050           | 0.014    | 0.005                 | 1          |
| 06PRB20  | 5044859   | 430160   | 1212           | 0.089    | 0.013                 | 1          |
| 06PRB21  | 5047075   | 430365   | 1314           | 0.308    | 0.025                 | 1          |
| 06PRB24  | 5046546   | 430906   | 1223           | 0.014    | 0.002                 | 2          |
| 06PRB25  | 5064321   | 423865   | 1241           | 0.120    | 0.006                 | 2          |
| 06PRB26  | 5063059   | 424177   | 1229           | 0.515    | 0.019                 | 3          |
| 06PRB27  | 5062392   | 424271   | 1243           | 0.217    | 0.127                 | 1          |
| 06PRB29  | 5059895   | 425104   | 1245           | 0.326    | 0.016                 | 3          |
| 06PRB38  | 5048450   | 401454   | 938            | 0.227    | 0.013                 | 2          |
| 06PRB44  | 5033171   | 414882   | 1083           | 0.237    | 0.017                 | 2          |
| 06PRB47  | 5017828   | 404008   | 1193           | 1.113    | 0.040                 | 2          |
| 06PRB49  | 5007344   | 398994   | 1167           | 0.127    | 0.020                 | 2          |
| 06PRB50  | 5002579   | 387175   | 1138           | 0.270    | 0.021                 | 2          |
| 06PRB51  | 4998485   | 382222   | 1106           | 0.239    | 0.015                 | 2          |
| 03NPRB01 | 4991027   | 357593   | 1059           | 0.013    | 0.001                 | 2          |
| 03NPRB03 | 5056562   | 407988   | 1286           | 0.652    | 0.026                 | 4          |
| 03NPRB04 | 5056178   | 408009   | 1200           | 0.110    | 0.009                 | 1          |
| 03NPRB05 | 5055618   | 407812   | 1107           | 0.155    | 0.009                 | 2          |
| 03NPRB06 | 5049133   | 406130   | 995            | 0.287    | 0.023                 | 1          |
| 03NPRB14 | 5044292   | 398714   | 904            | 0.056    | 0.004                 | 2          |
| 03NPRB16 | 5058402   | 380681   | 1297           | 1.073    | 0.086                 | 1          |
| 03NPRB18 | 5054391   | 379947   | 1262           | 0.105    | 0.005                 | 3          |
| 03NPRB19 | 5055093   | 387415   | 1302           | 0.981    | 0.039                 | 4          |
| 03NPRB22 | 5068114   | 399197   | 911            | 0.603    | 0.028                 | 3          |
| 03NPRB25 | 5048026   | 404138   | 917            | 0.152    | 0.012                 | 1          |
| 638-2    | 5335999   | 537373   | 665            | 0.144    | 0.014                 | 2          |
| CLK1     | 4825072   | 490576   | 1528           | 0.205    | 0.012                 | 2          |
| CLK5     | 4838614   | 492079   | 1550           | 0.536    | 0.025                 | 3          |
| CLK6     | 4832988   | 483766   | 1453           | 0.127    | 0.010                 | 1          |
| CLK7     | 4930776   | 357758   | 1416           | 0.019    | 0.001                 | 2          |

| Sample | Northing | Easting | Elevation (m)* | Age (Ma) | 2 $\sigma$ error (Ma) | Replicates |
|--------|----------|---------|----------------|----------|-----------------------|------------|
| CLK8   | 4912347  | 377863  | 1428           | 0.117    | 0.007                 | 2          |
| CLK9   | 4882411  | 470401  | 1361           | 0.013    | 0.002                 | 2          |
| PRB11  | 4823950  | 486370  | 1500           | 0.010    | 0.001                 | 2          |
| PRB12  | 4823787  | 489538  | 1532           | 0.120    | 0.007                 | 2          |
| PRB15  | 4820745  | 492990  | 1559           | 0.216    | 0.012                 | 2          |
| PRB17  | 4822765  | 495900  | 1602           | 0.615    | 0.035                 | 2          |
| PRB18  | 4822594  | 495800  | 1601           | 0.550    | 0.031                 | 2          |
| PRB19  | 4822695  | 494515  | 1593           | 0.502    | 0.028                 | 2          |
| PRB20  | 4836235  | 460503  | 1539           | 0.024    | 0.001                 | 2          |
| SPL2   | 4836221  | 487925  | 1440           | 0.482    | 0.027                 | 2          |
| SPL3   | 4836273  | 485855  | 1439           | 0.198    | 0.011                 | 2          |

\*Elevation determined from National Elevation Dataset 1" digital elevation model.
